# Supplementary figures and images for: Advisor high-definition HD Grid catheter for mapping accessory pathways in pediatrics
Source: PubMed Central journal article supplement — HeartRhythm Case Rep. 2020 Sep 25;6(12):925–9. doi: 10.1016/j.hrcr.2020.09.009 (PMC7749223; doi:10.1016/j.hrcr.2020.09.009), 2020-09-25

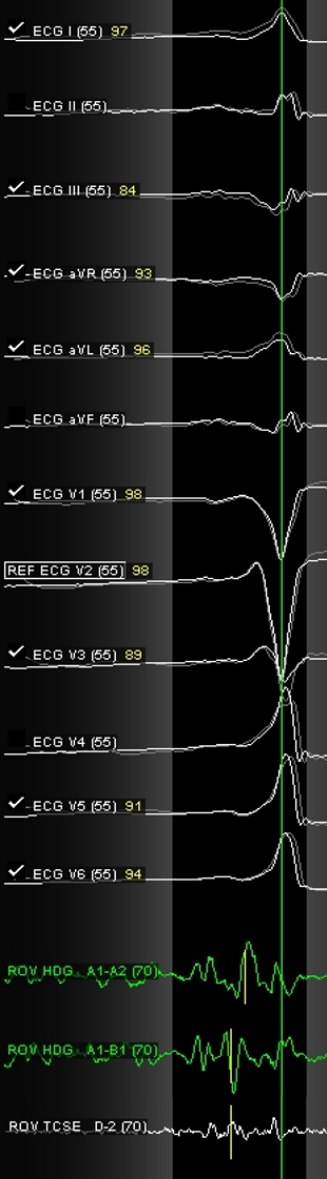

Supplement: mmc1.pdf [file mmc1.pdf]

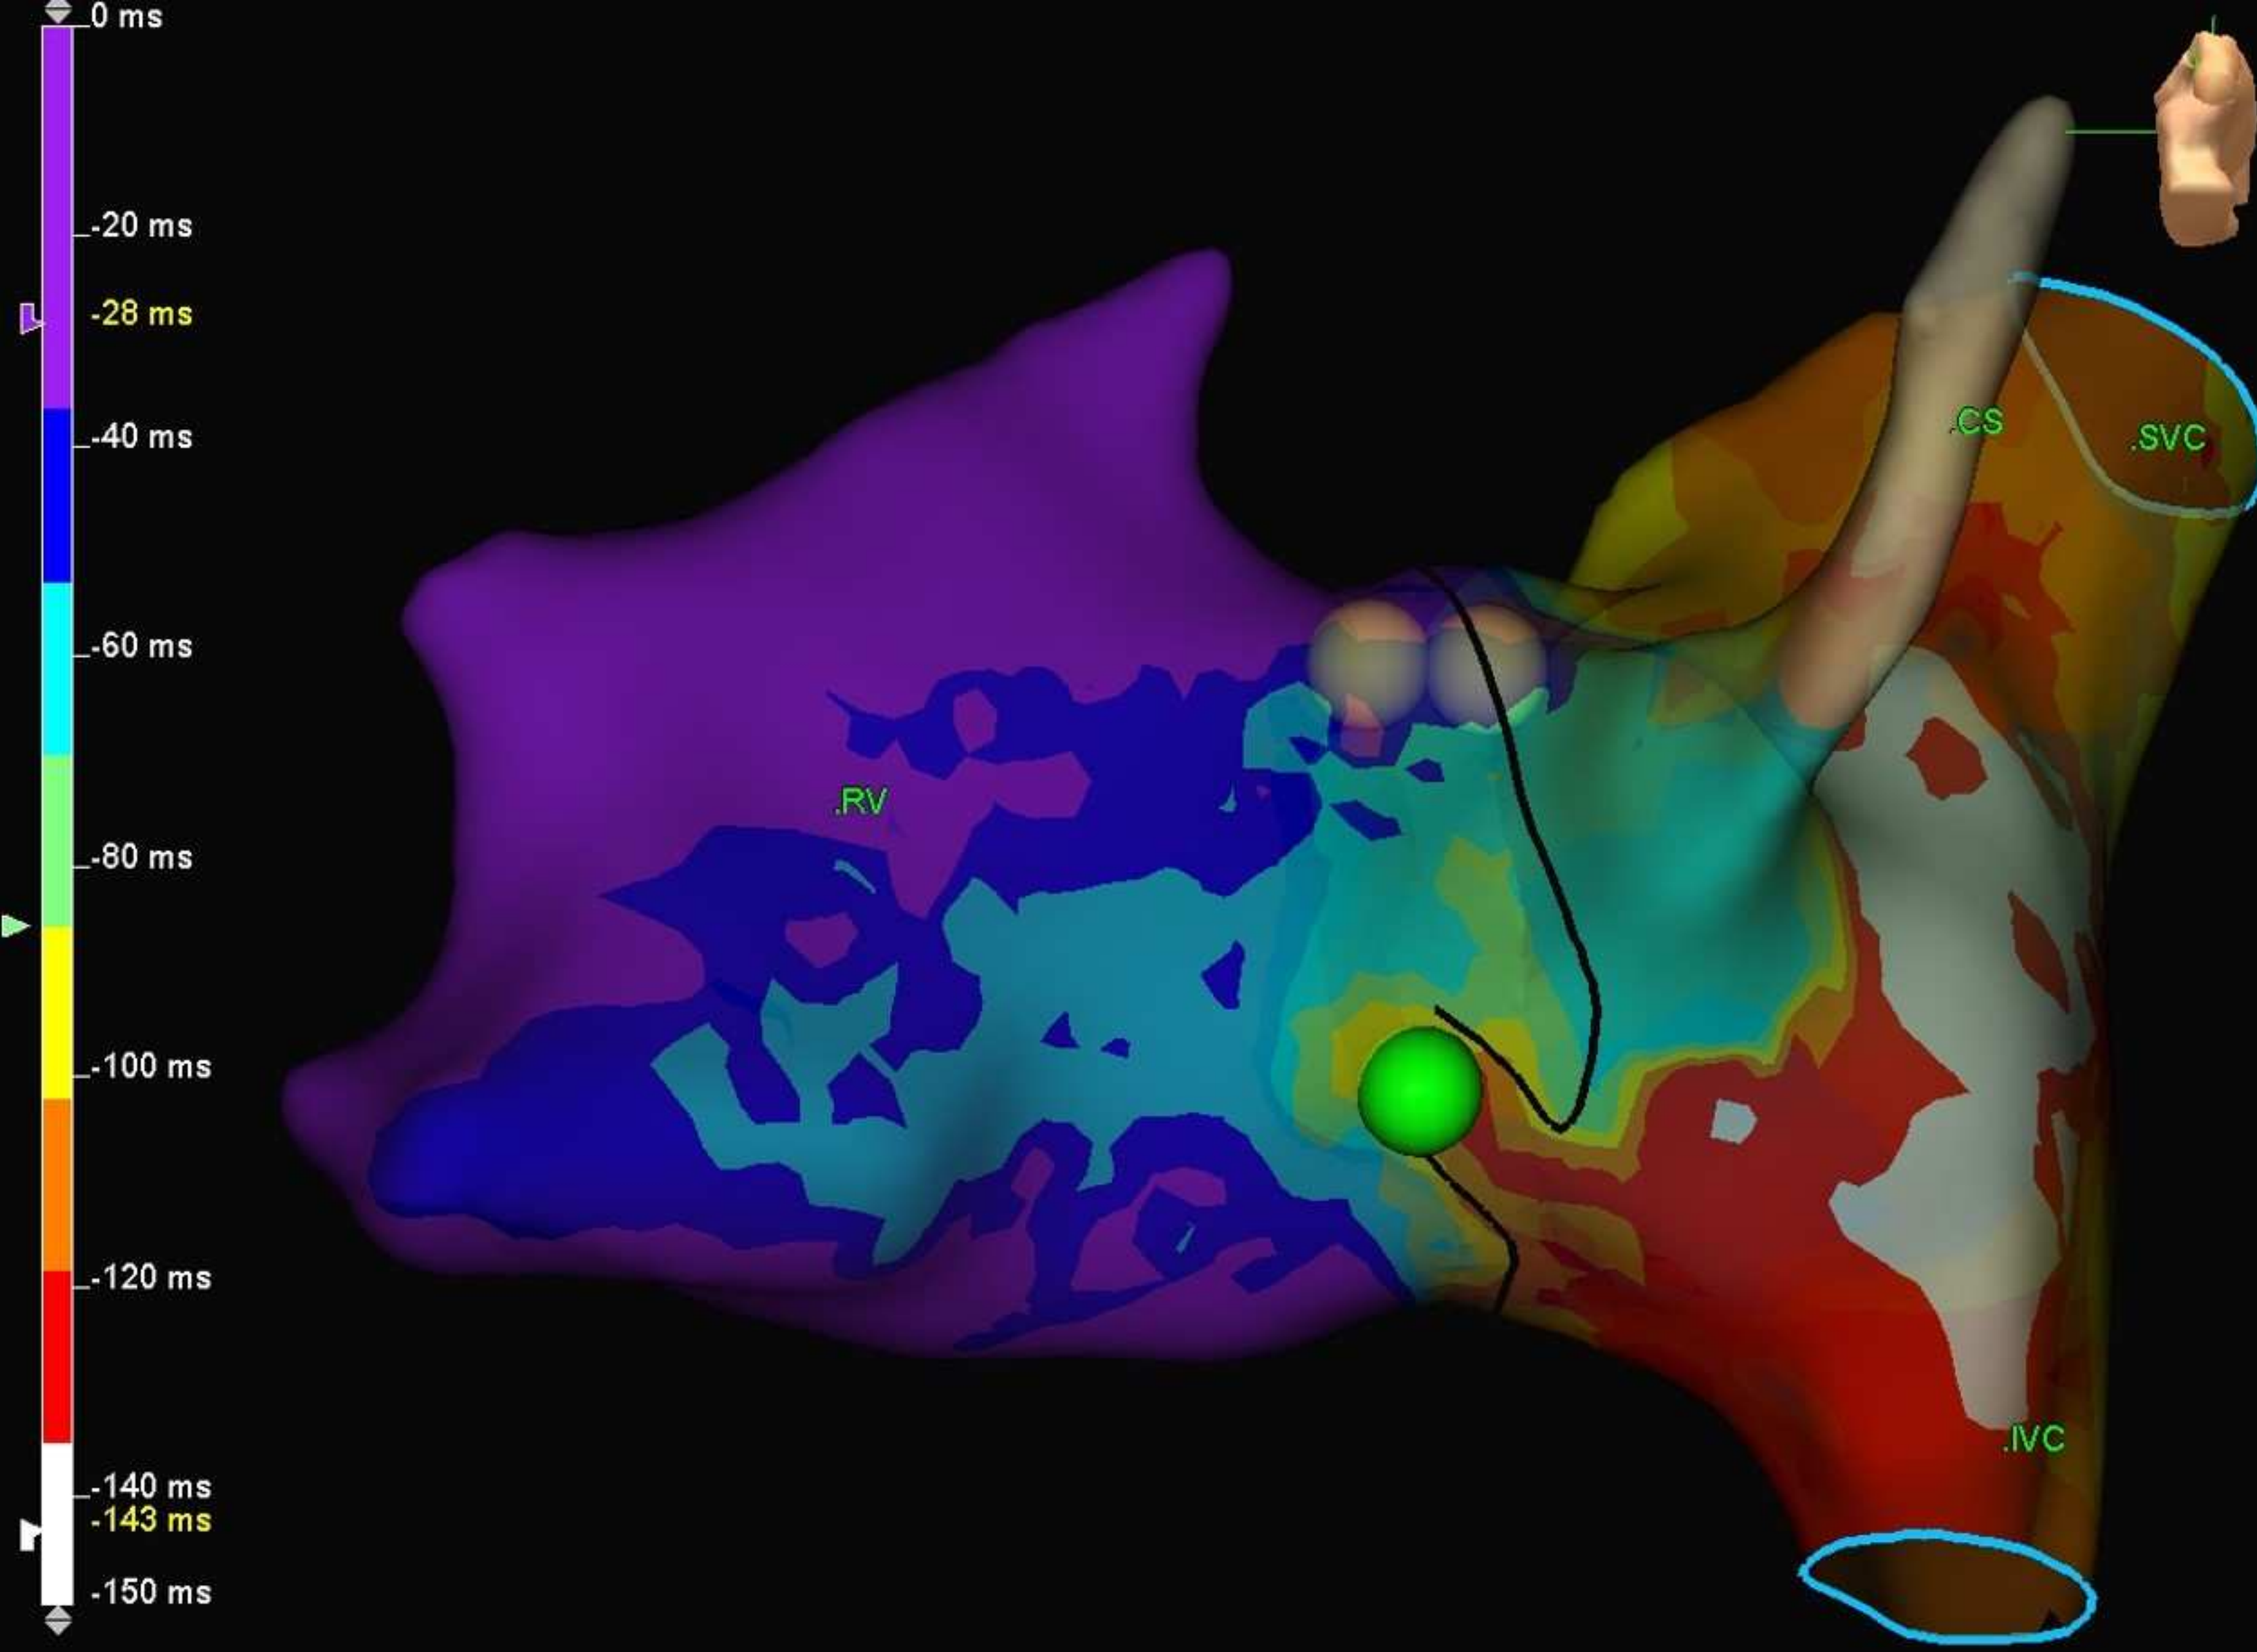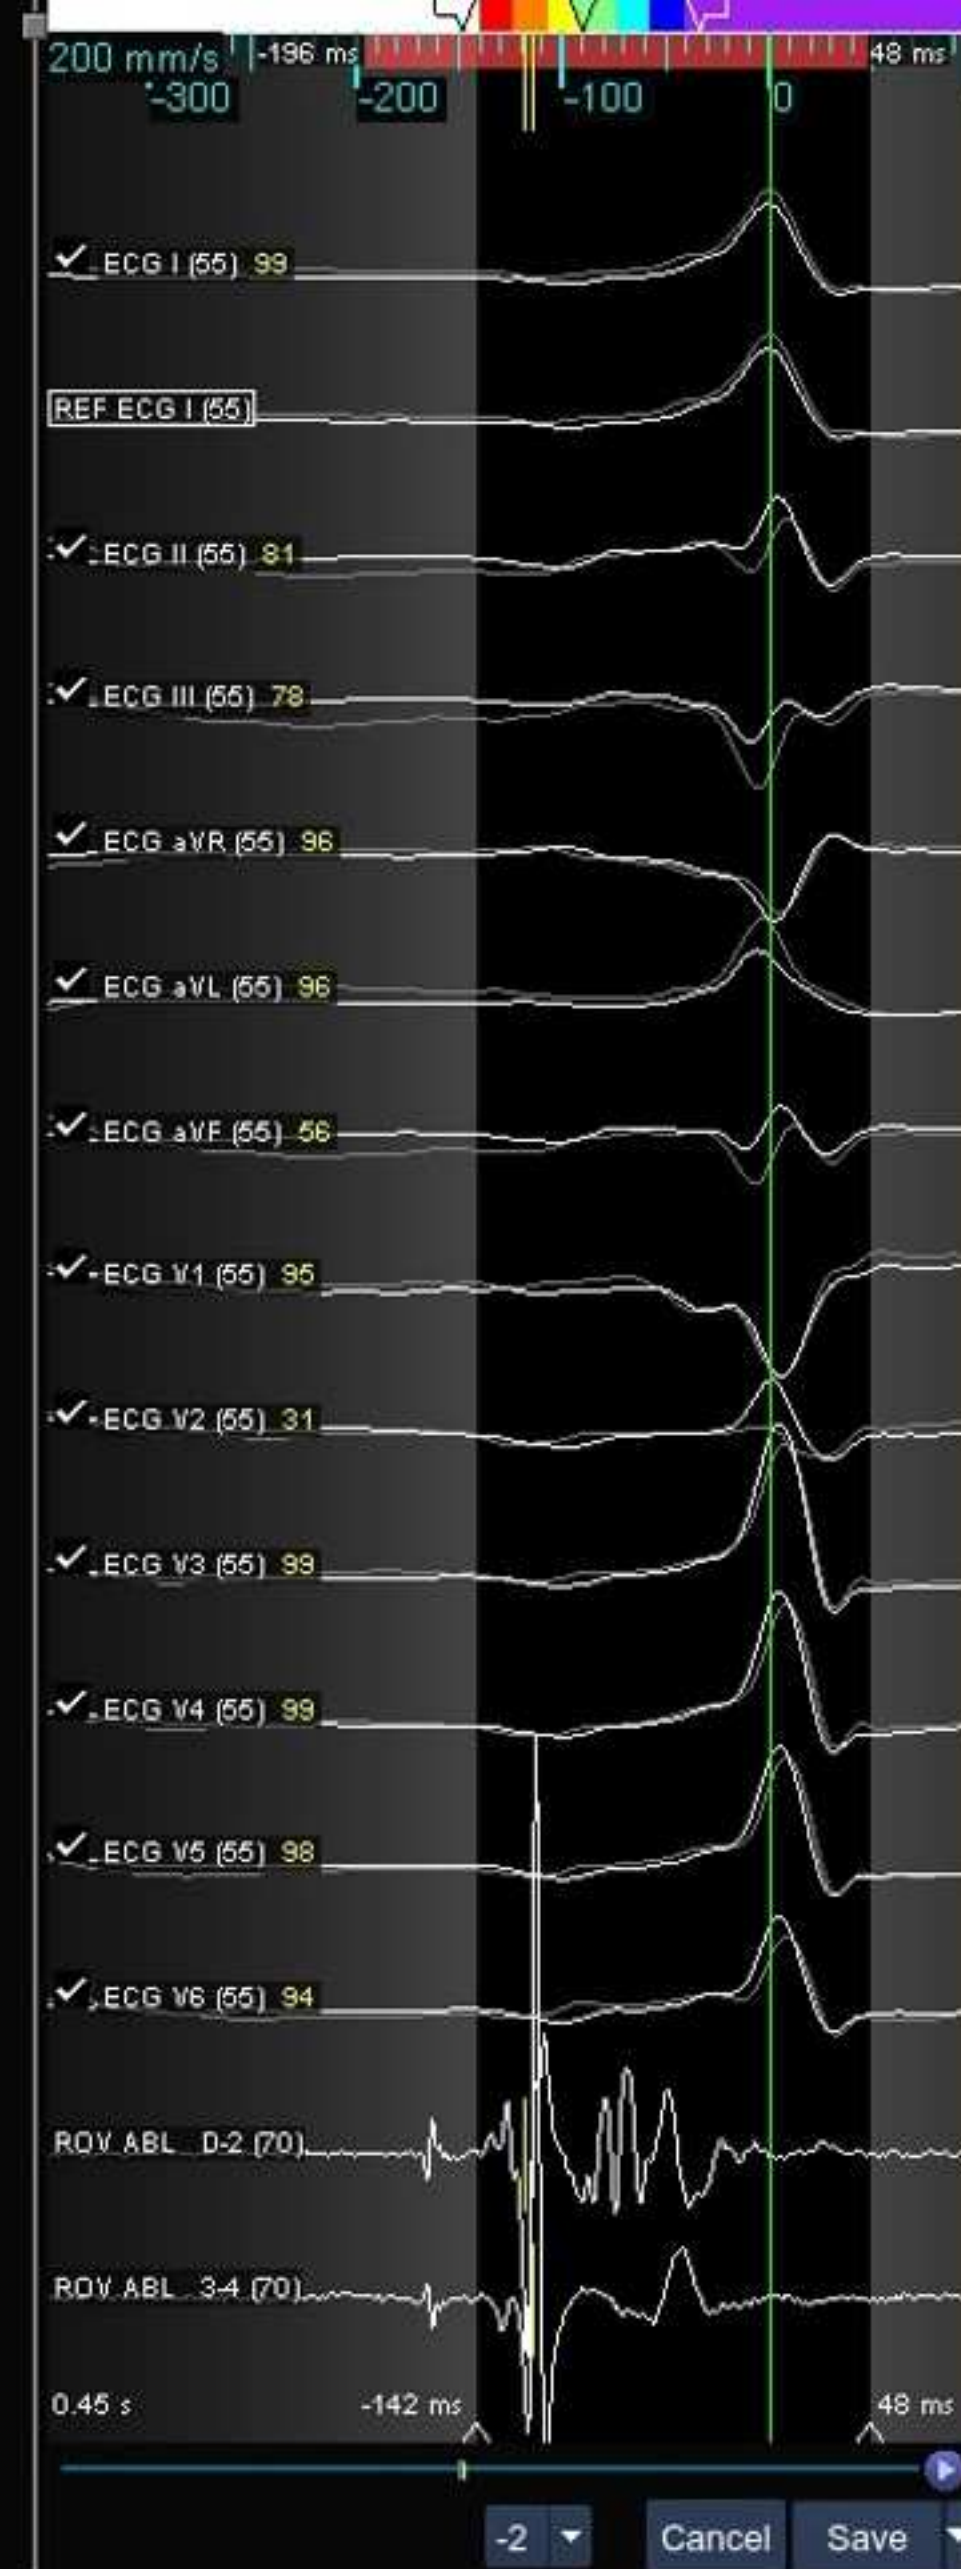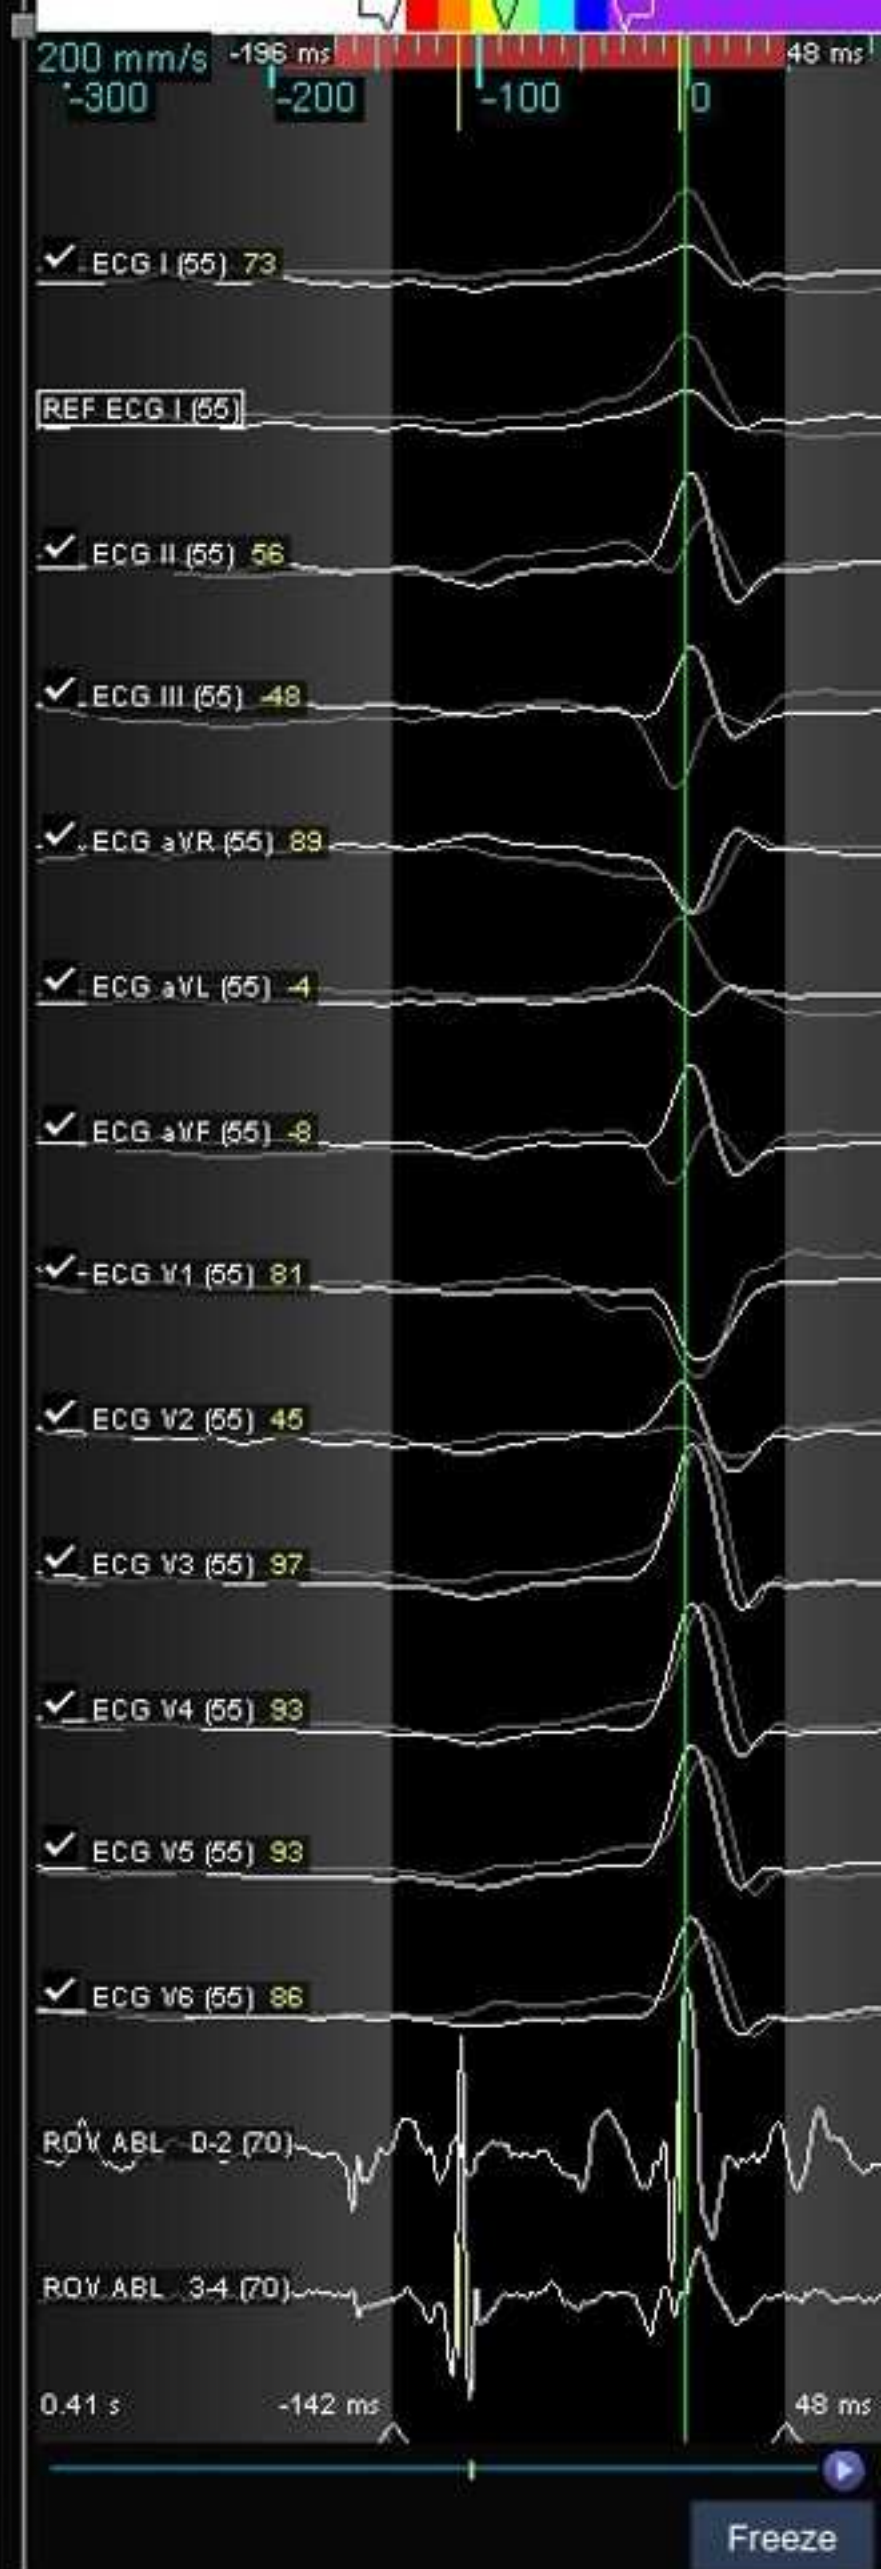

Supplement: mmc2.pdf [file mmc2.pdf]
